# Supplementary material for: Lactoferrin targeting INTL1 receptor inhibits hepatocellular carcinoma progression via apoptosis and cell cycle signaling pathways
Source: PubMed Central journal article supplement — Sci Rep. 2024 Dec 28;14:31210. doi: 10.1038/s41598-024-82514-4 (PMC11682196; doi:10.1038/s41598-024-82514-4), 2024-12-28
Supplement: 41598_2024_82514_MOESM1_ESM.pdf [file 41598_2024_82514_MOESM1_ESM.pdf]

## Supplementary Materials

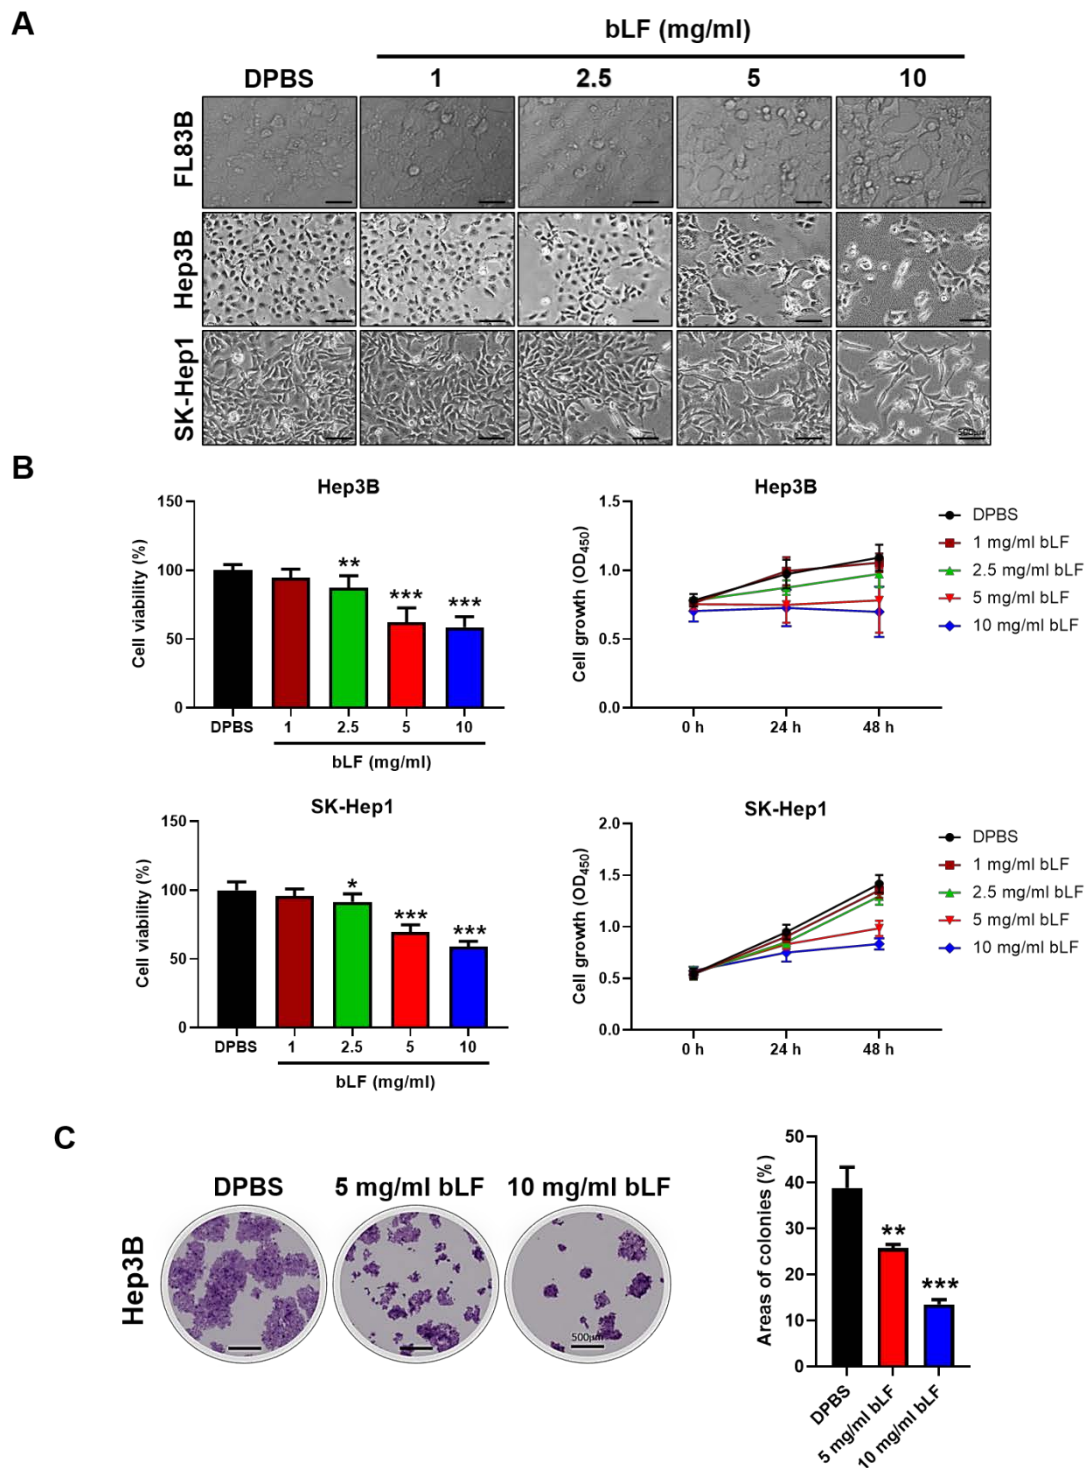

**Figure S1.** Effects of bovine lactoferrin (bLF) on the proliferation of human liver cancer cells. **(A)** Representative images of FL83B, Hep3B, and SK-Hep1 cells after 48 h of incubation with either LF (1, 2.5, 5, and 10 mg/ml) or DPBS (control). **(B)** Cell viability and proliferation profiles. The cell viability (48 h) and proliferation profiles (0, 24, and 48 h) were tested by CCK-8. **(C)** Representative images of the Hep3B colony formation assay (scale bars, 500  $\mu$ m). Statistical significance: \* ( $p < 0.05$ ), \*\* ( $p < 0.01$ ), and \*\*\* ( $p < 0.001$ ) vs. DPBS.

**Table S1.** The details of the antibodies used in this study

| Antibody             | Dilutions |       | Host   | Brand          | Cat. No   |
|----------------------|-----------|-------|--------|----------------|-----------|
|                      | WB        | IHC   |        |                |           |
| BAX                  | 1000 x    |       | Rabbit | SAB            | 34260     |
| Bcl-2                | 1000 x    |       | Rabbit | Cell Signaling | 2872      |
| Caspase-3            | 1000 x    |       | Rabbit | Cell Signaling | 9662      |
| Caspase-3 (cleaved)  | 1000 x    |       | Rabbit | Cell Signaling | 9661      |
| CD31                 |           | 200 x | Rabbit | Arigo          | ARG52748  |
| CDK2                 | 1000 x    |       | Rabbit | Cell Signaling | 2546      |
| CDK2                 |           | 200 x | Rabbit | Servicebio     | GB112129  |
| CDK4                 | 1000 x    |       | Rabbit | Cell Signaling | 12790     |
| CDK4                 |           | 200 x | Rabbit | Servicebio     | GB11238-2 |
| c-Jun (S73)          | 1000 x    |       | Rabbit | Cell Signaling | 3270      |
| Cyclin A             | 1000 x    |       | Mouse  | Santa Cruz     | sc-239    |
| Cyclin D1            | 2000 x    |       | Rabbit | abcam          | ab226977  |
| Cytochrome C         | 1000 x    |       | Rabbit | Cell Signaling | 11940S    |
| ERK1/2               | 1000 x    |       | Rabbit | Cell Signaling | 4695      |
| ERK1/2 (T202/Y204)   | 2000 x    |       | Rabbit | Cell Signaling | 4370      |
| ITLN1                | 2000 x    |       | Rabbit | SAB            | 36560     |
| JNK                  | 1000 x    |       | Rabbit | Cell Signaling | 9252      |
| JNK (T183/Y185)      | 1000 x    |       | Rabbit | Cell Signaling | 4668      |
| Lactoferrin          | 1000 x    |       | Goat   | abcam          | ab112970  |
| LRP1                 | 1000 x    |       | Rabbit | abcam          | ab227734  |
| p21                  | 1000 x    |       | Rabbit | Cell Signaling | 2947      |
| p27                  | 1000 x    |       | Rabbit | Cell Signaling | 2552      |
| p27 (S10)            | 1000 x    |       | Rabbit | abcam          | ab62364   |
| p38 MAPK             | 1000 x    |       | Rabbit | Cell Signaling | 8690      |
| p38 MAPK (T180/Y182) | 1000 x    |       | Rabbit | Cell Signaling | 4511      |
| PARP1                | 1000 x    |       | Mouse  | Santa Cruz     | sc-8007   |
| PARP1 (cleaved)      | 1000 x    |       | Rabbit | Merck          | AB3565    |
| TLR4                 | 1000 x    |       | Mouse  | Santa Cruz     | sc-293072 |
| TRAF2                | 1000 x    |       | Mouse  | Santa Cruz     | sc-136999 |
| VEGF                 |           | 200 x | Mouse  | Santa Cruz     | sc-7269   |
| $\beta$ -actin       | 2500 x    |       | Mouse  | Santa Cruz     | sc-7963   |

SAB: Signalway Antibody LLC. (Greenbelt, Maryland, USA)

Arigo: Arigo Biolaboratories (Hsinchu City, Taiwan, ROC)

Servicebio: Servicebio Technology Co., Ltd. (Wuhan, Hubei, China)

**Table S2.** Information on the shRNA clones used in this study

| shRNA name     | Taxonomy | NM ID     | target gene | target sequence        | shRNA type |
|----------------|----------|-----------|-------------|------------------------|------------|
| TRCN0000158887 | human    | NM_017625 | ITLN1       | GCATCTTATTACTCACCTAT   | plasmid    |
| TRCN0000137105 | human    | NM_017625 | ITLN1       | CCAGTGAAATATGGAGAAGGA  | plasmid    |
| TRCN0000134450 | human    | NM_017625 | ITLN1       | GATATGGAACTCATGTTGGTT  | plasmid    |
| TRCN0000230616 | human    | NM_002332 | LRP1        | GTCCAACACTACAGTTACTTAA | lentivirus |
| TRCN0000257100 | human    | NM_002332 | LRP1        | GATCCGTGTGAACCGCTTTAA  | lentivirus |
| TRCN0000230615 | human    | NM_002332 | LRP1        | GATGCCTATCTGGACTATATT  | lentivirus |

For transfection control, an empty cloning vector (pLAS3w.FLuc.Ppuro) was used.
