# Supplementary figures and images for: Lactoferrin targeting INTL1 receptor inhibits hepatocellular carcinoma progression via apoptosis and cell cycle signaling pathways
Source: PubMed Central journal article supplement — Sci Rep. 2024 Dec 28;14:31210. doi: 10.1038/s41598-024-82514-4 (PMC11682196; doi:10.1038/s41598-024-82514-4), 2024-12-28

**Figure 2F**

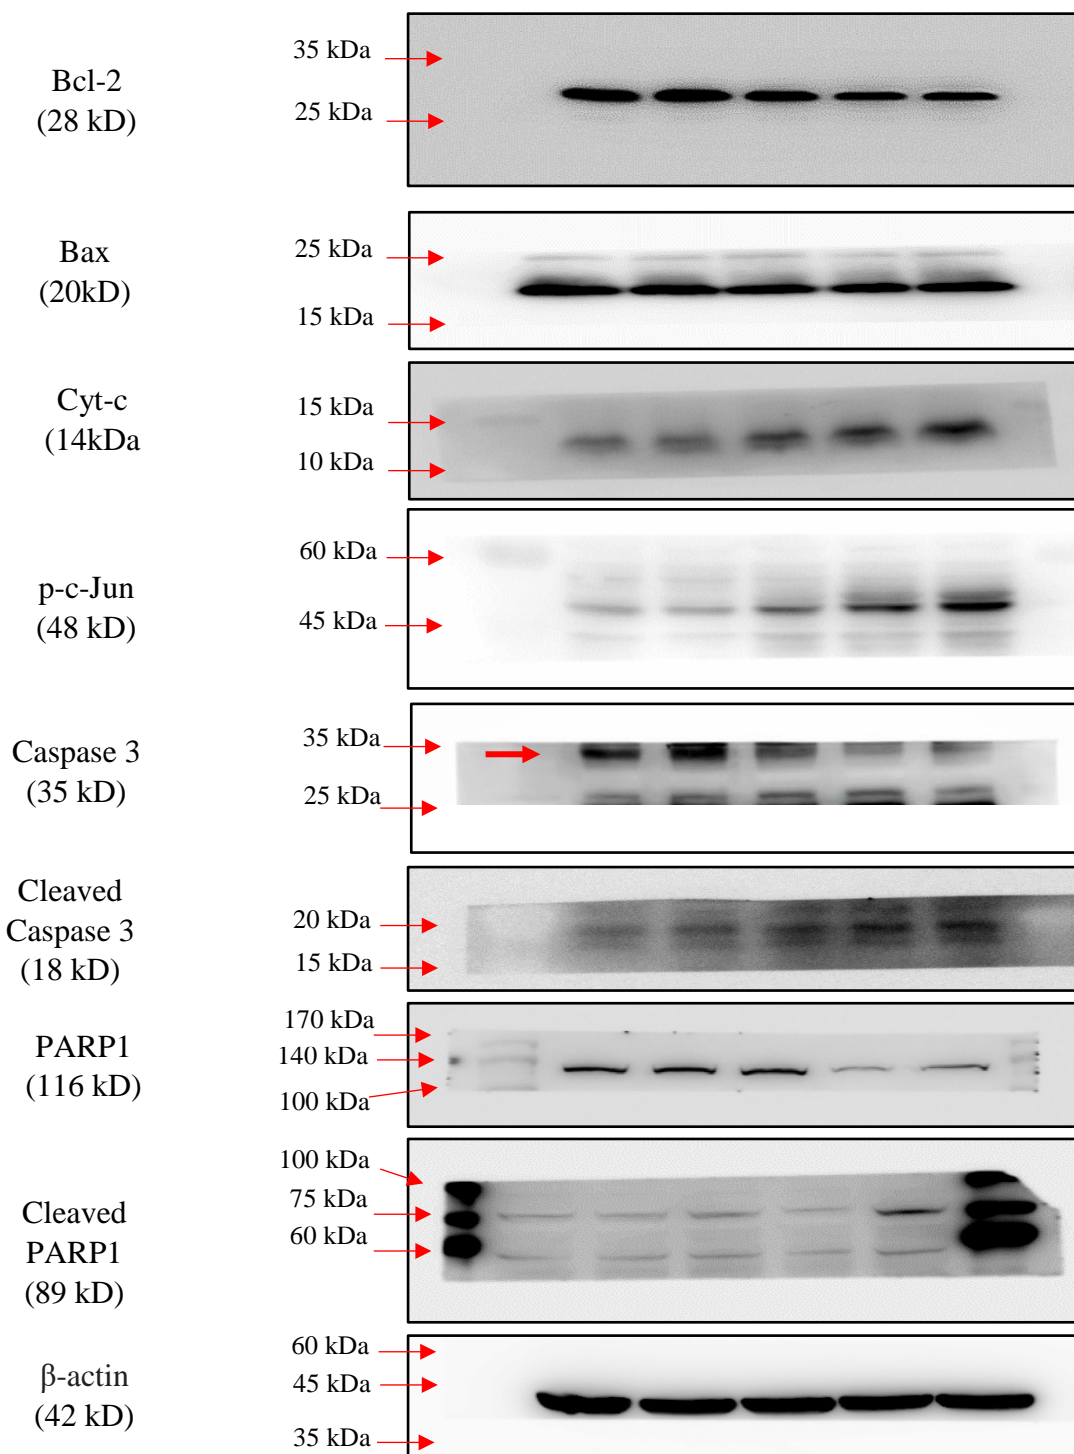

**Figure 3A**

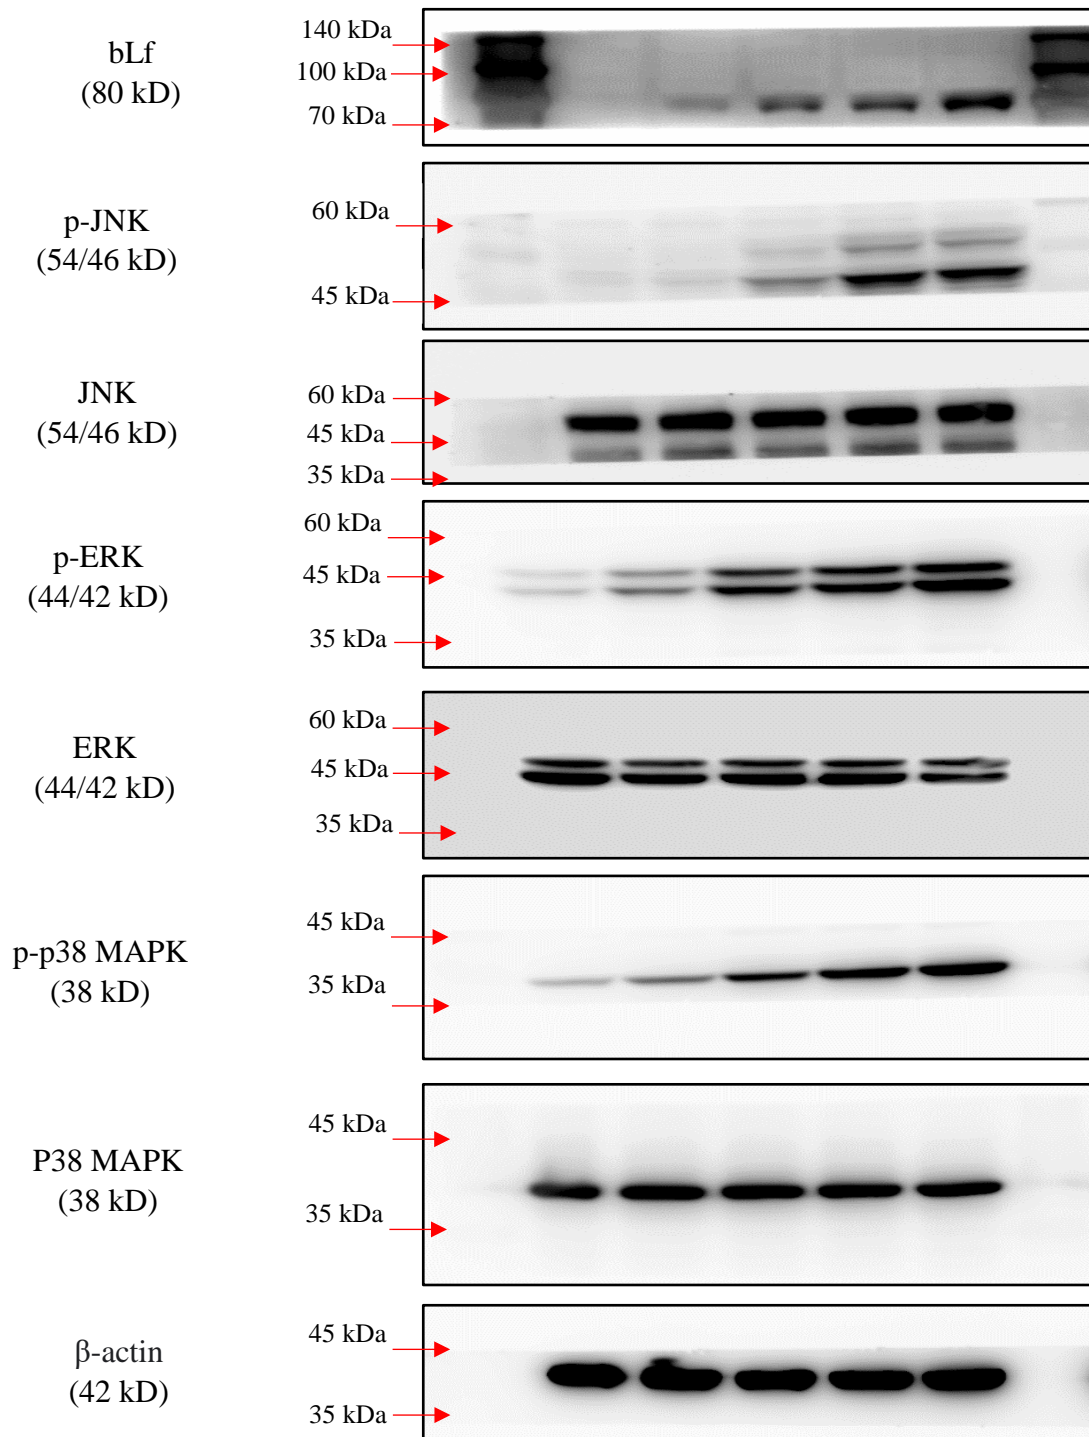

**Figure 3B**

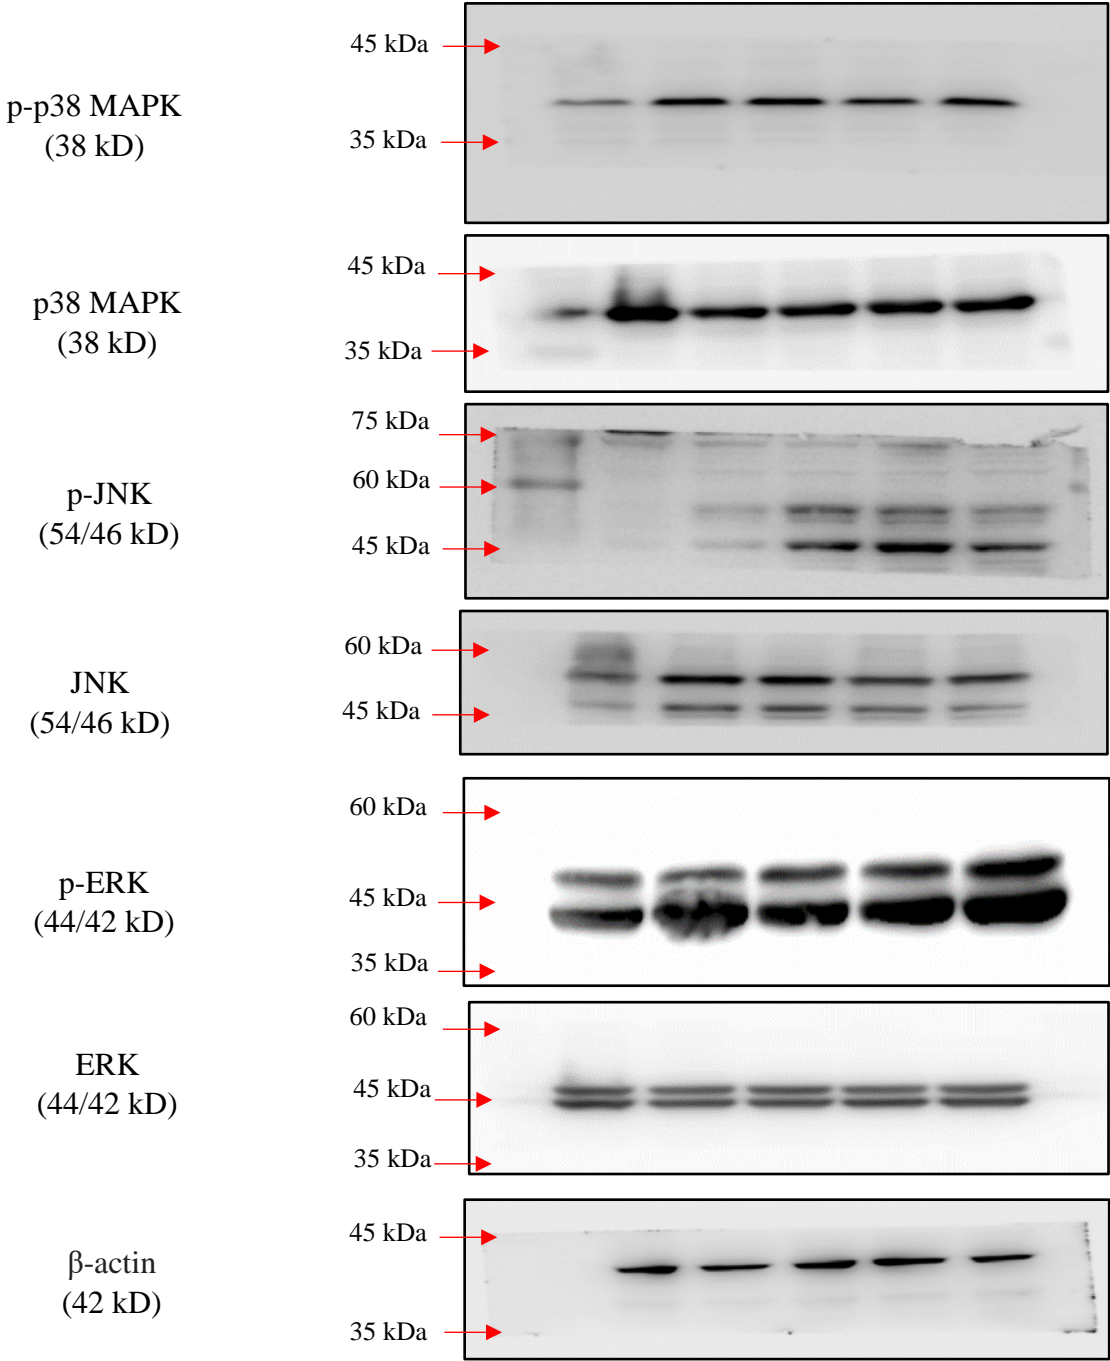

**Figure 3G**

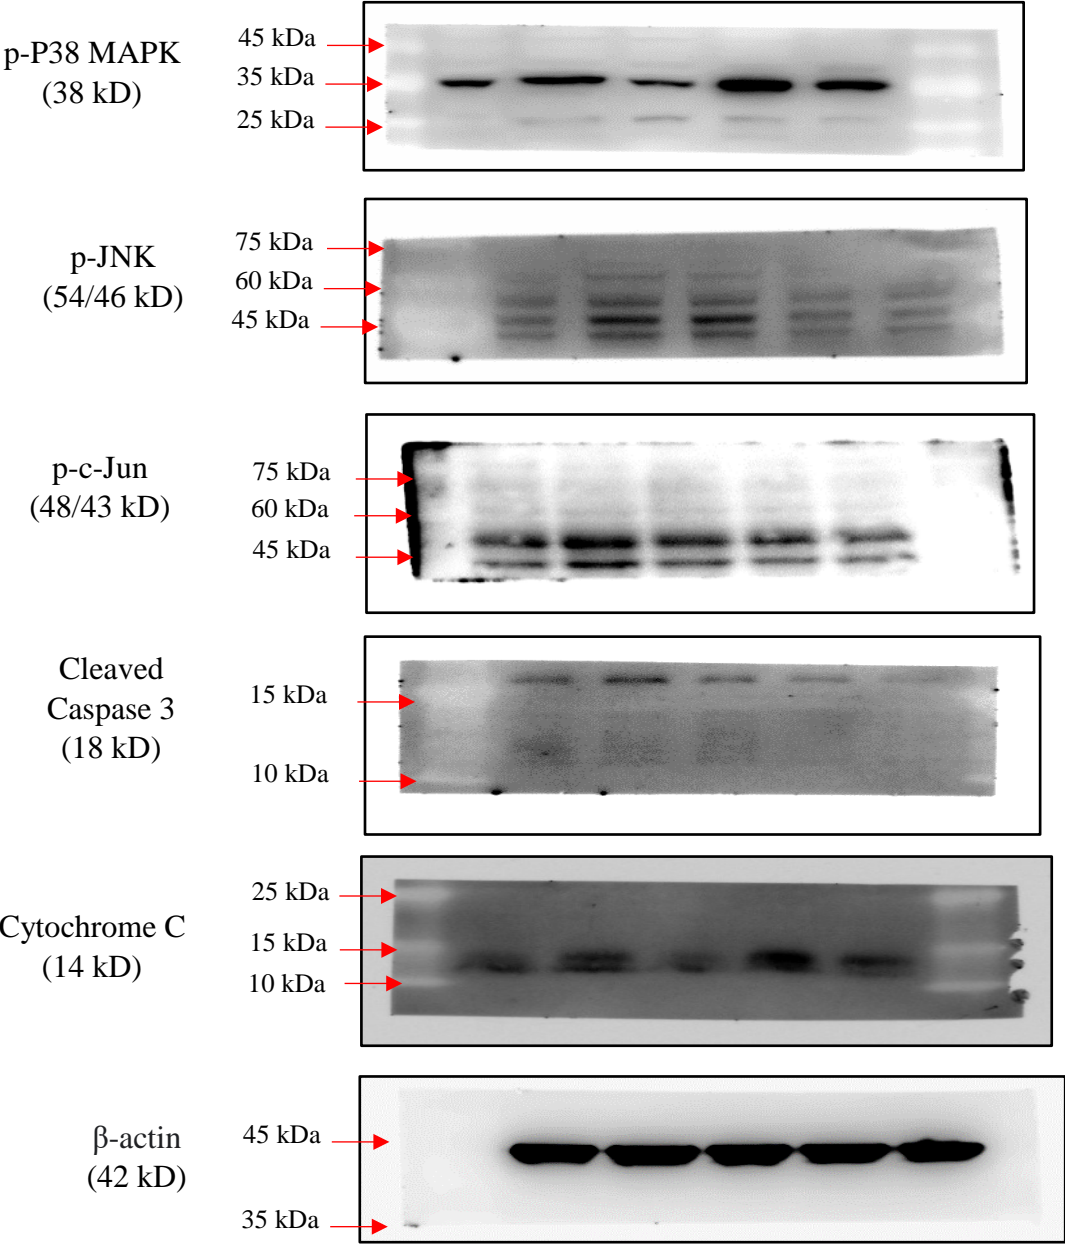

**Figure 4C**

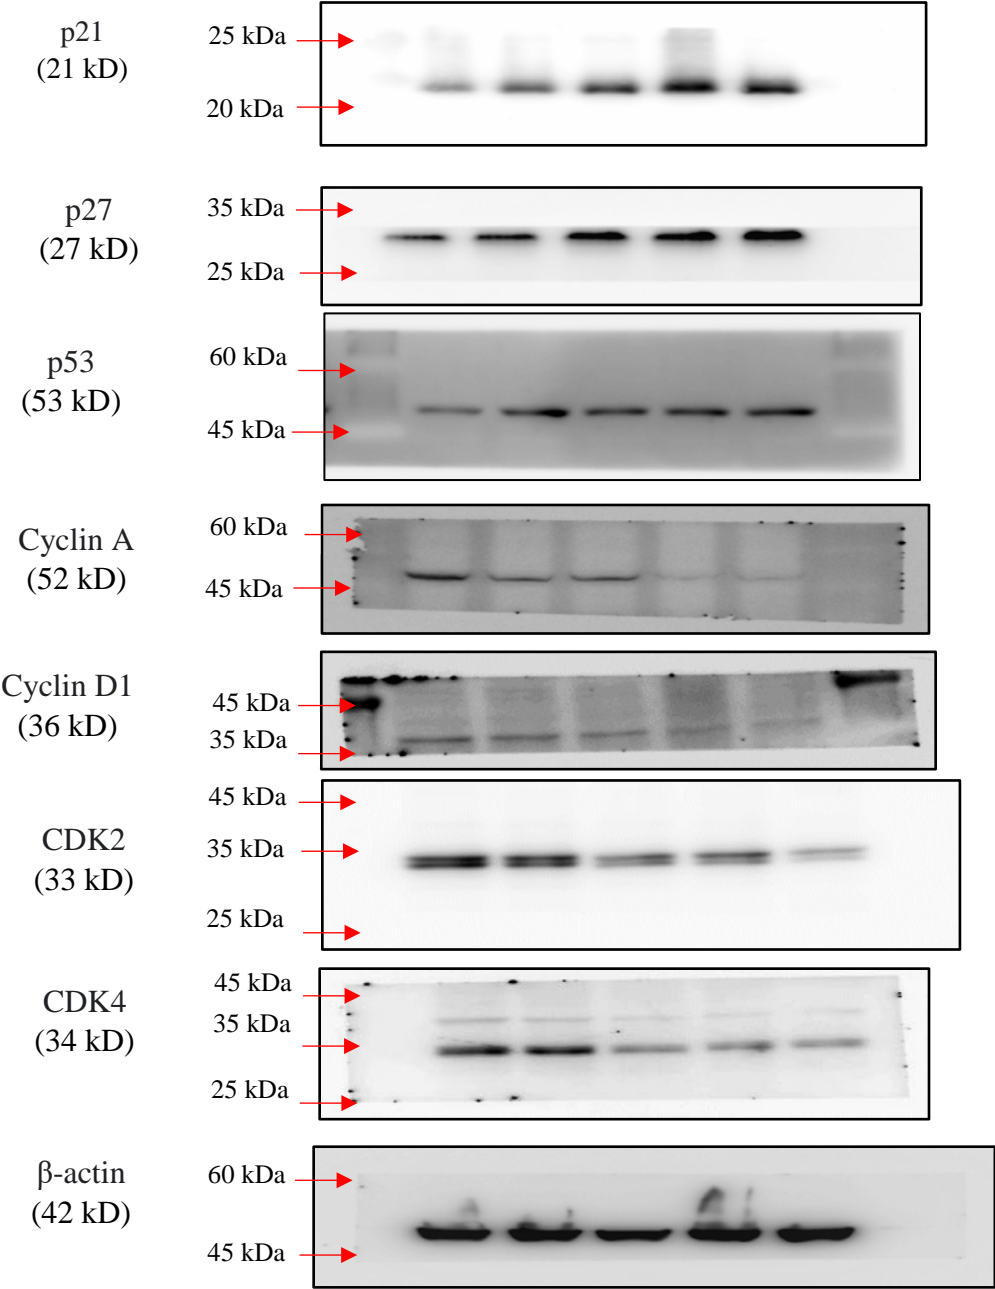

**Figure 4E**

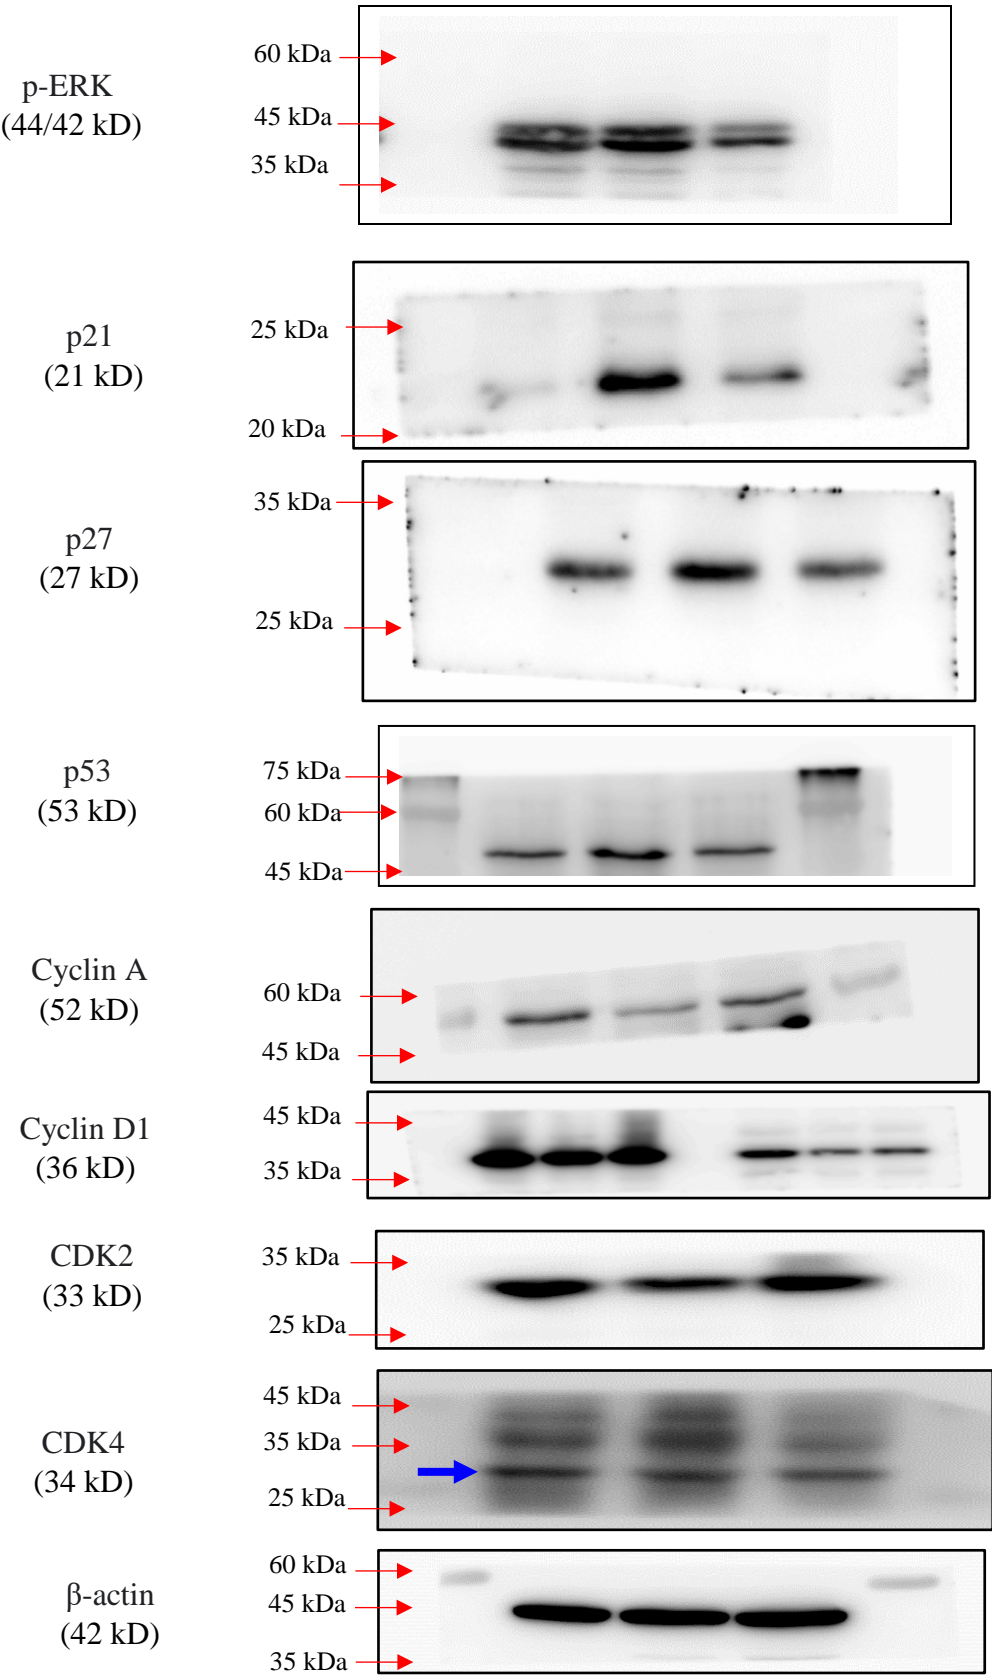

**Figure 5A**

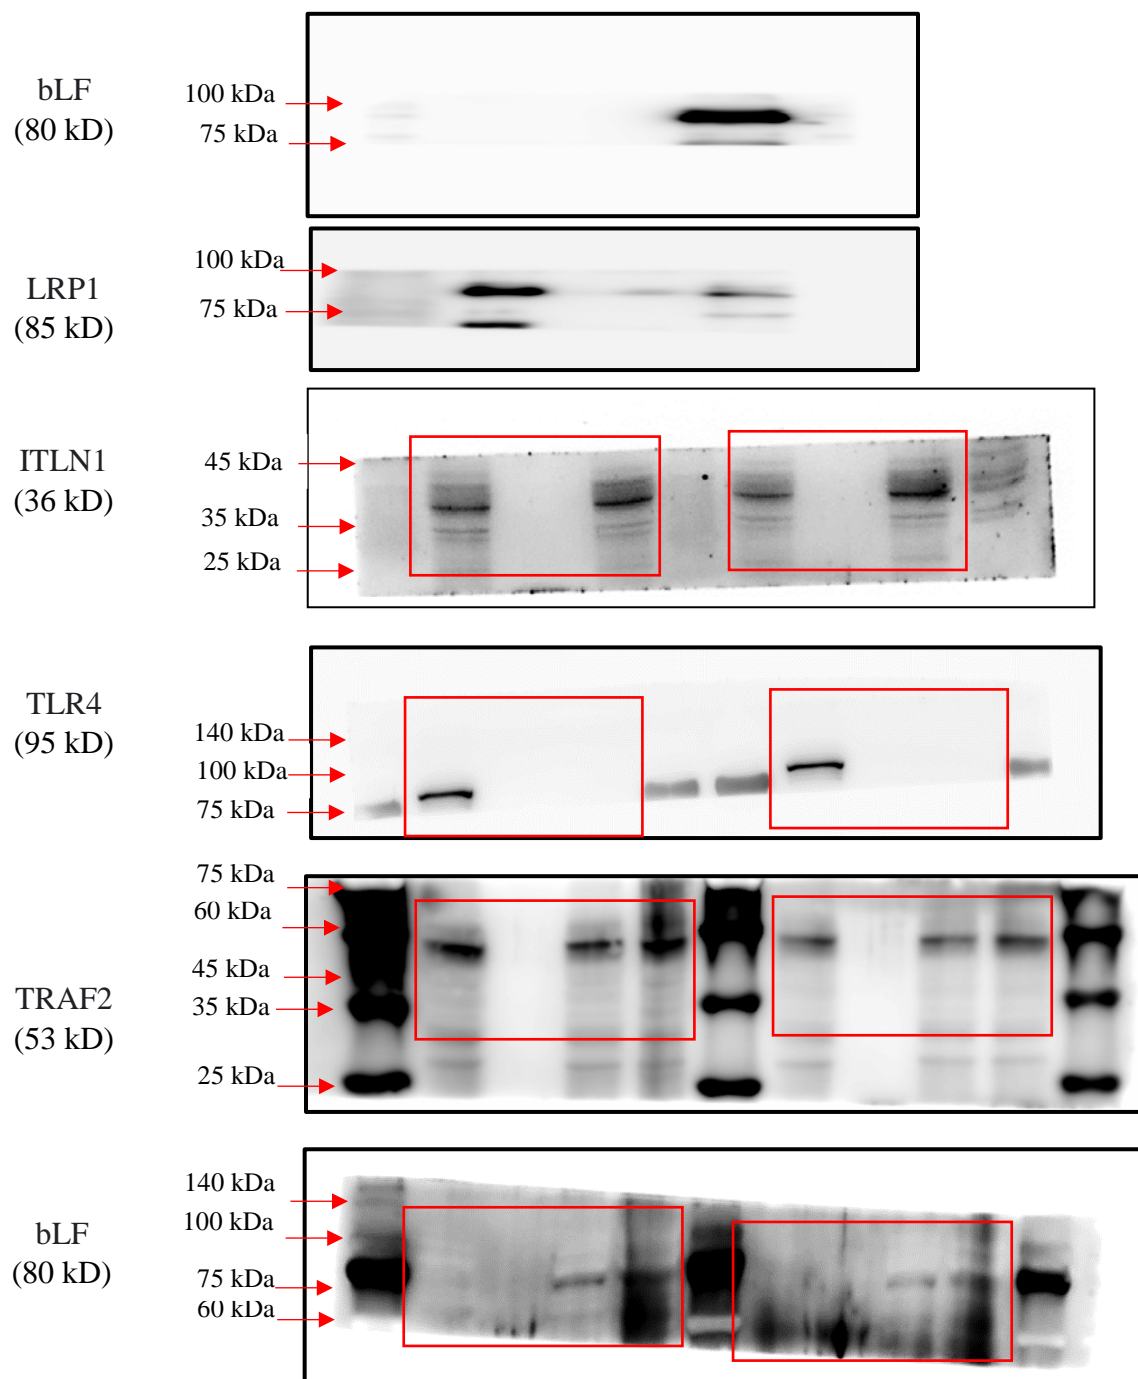

**Figure 5B**

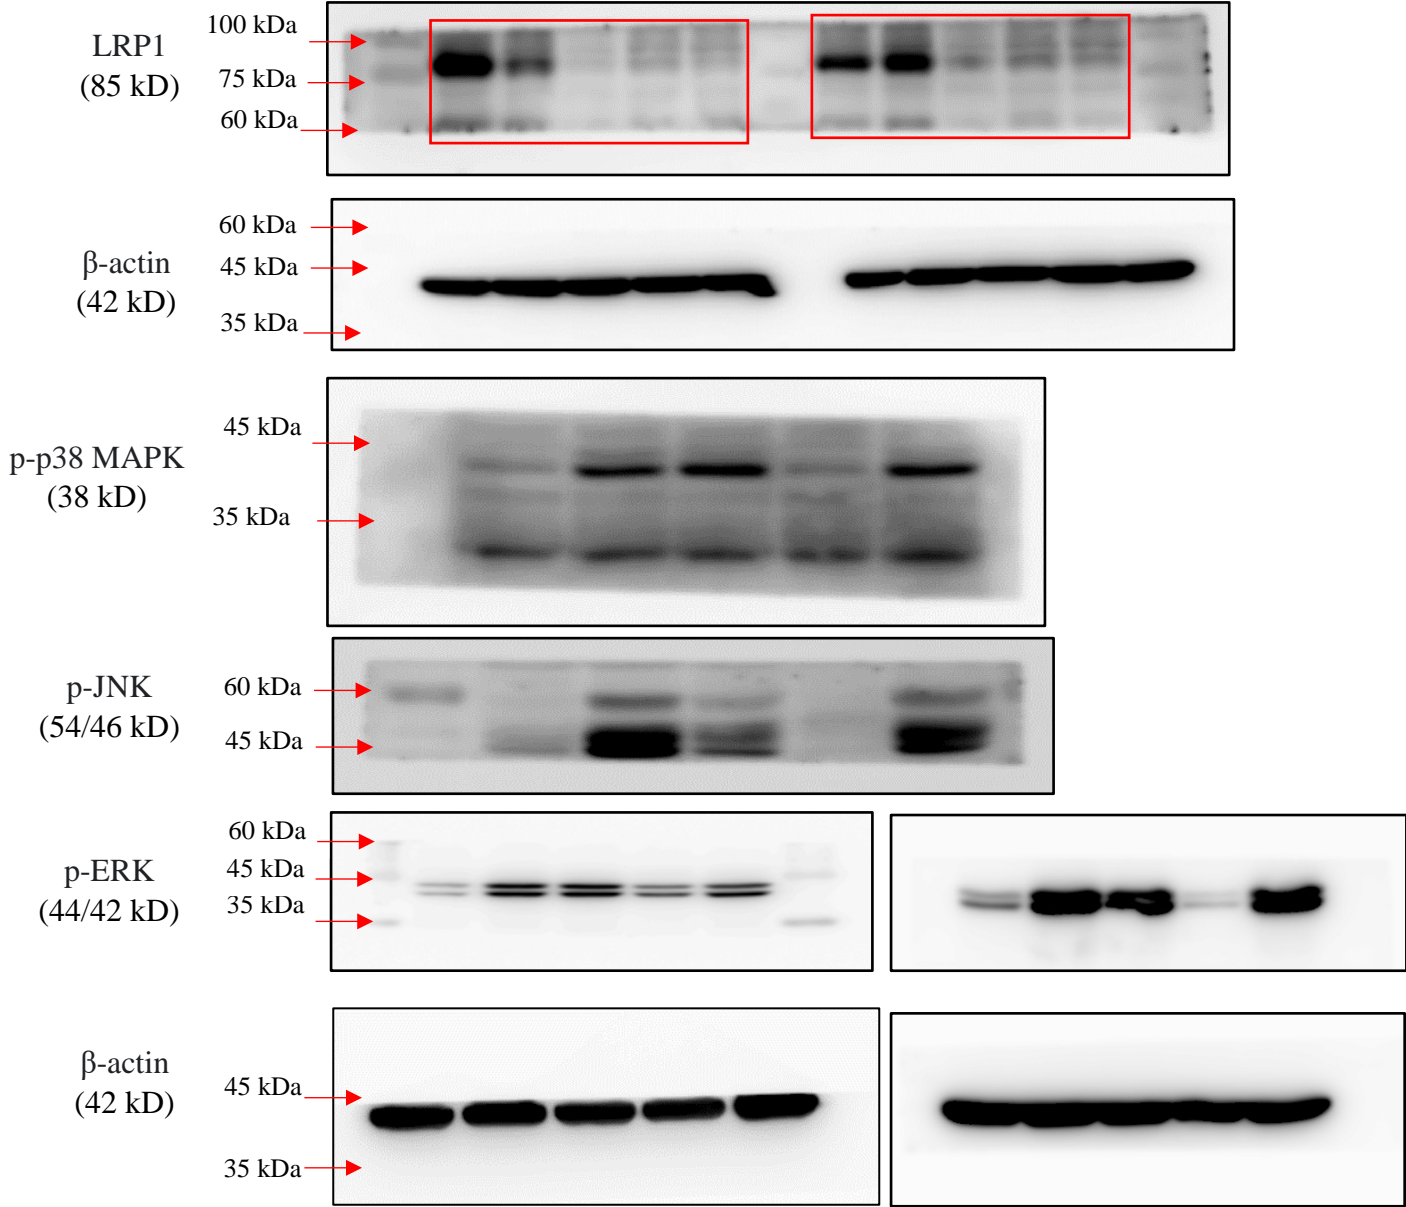



**Figure 5C**

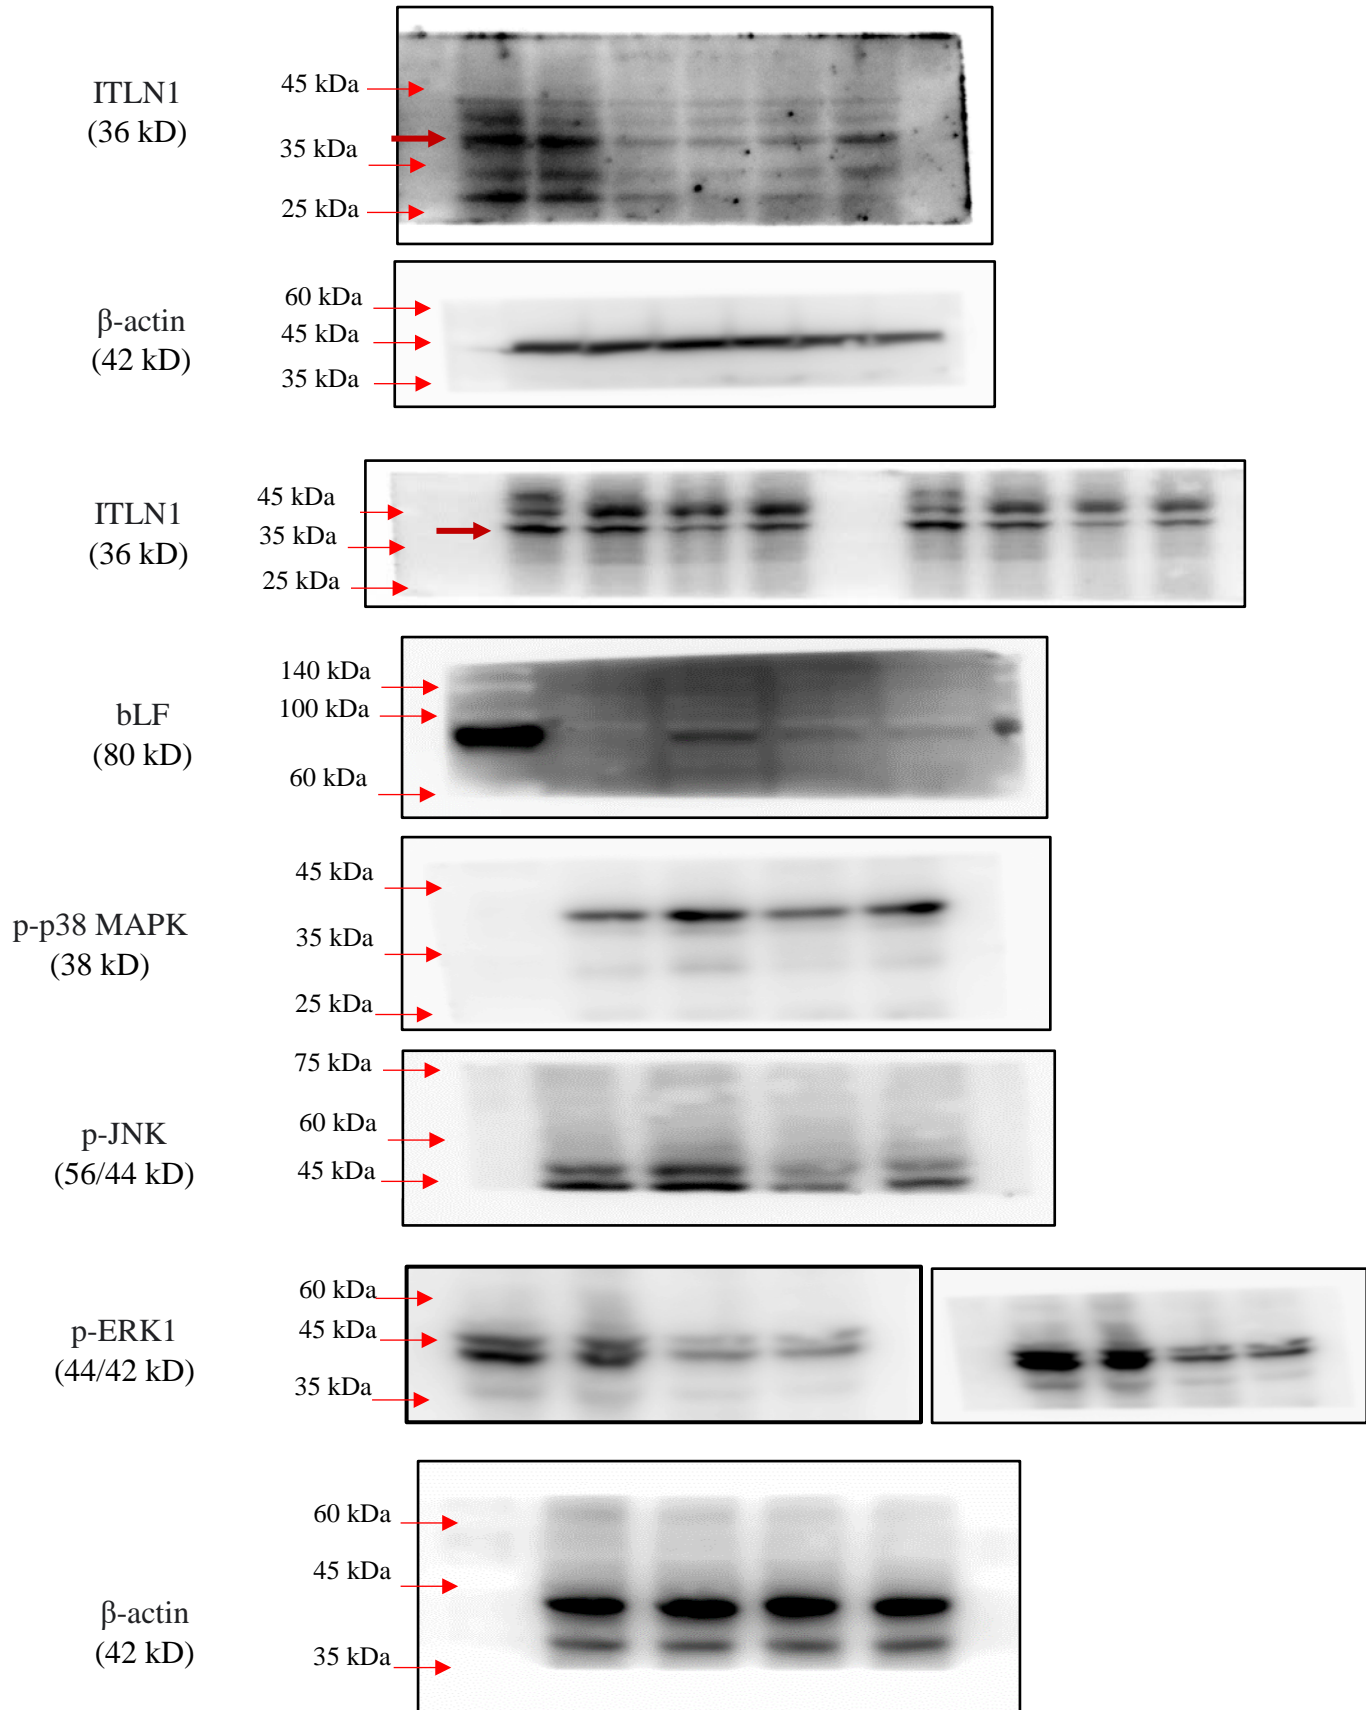

Supplement: 41598_2024_82514_MOESM2_ESM.pdf [file 41598_2024_82514_MOESM2_ESM.pdf]
